# Supplementary material for: Predictive and Experimental Immunogenicity of Burkholderia Collagen-like Protein 8-Derived Antigens
Source: MDPI journal article supplement (doi:10.3390/vaccines9111219), 2021-10-20
Supplement: s1 [file s1]

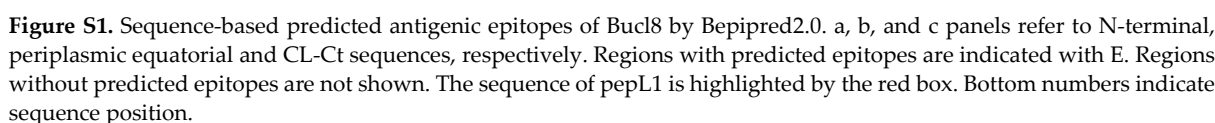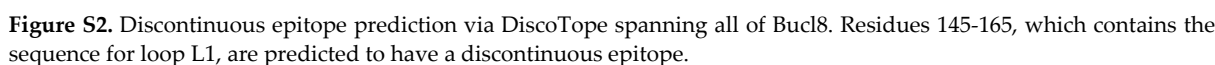

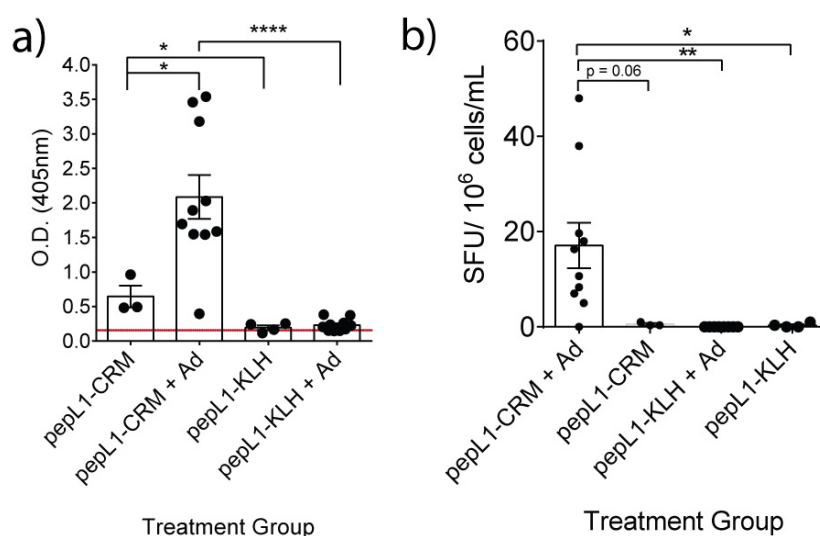

**Figure S3.** Analysis of humoral responses in CD-1 mice vaccinated with CRM<sub>197</sub>- or KLH-conjugated pepL1. (a) Indirect ELISA with sera from mice vaccinated with pepL1-CRM<sub>197</sub>- or KLH-conjugated with or without AddaVax adjuvant. Wells were coated with 1 µg of non-conjugated pepL1. Red line represents background immunoreactivity. (b) Antigen-specific B cells assessed via ELISpot. Wells were coated with 1 µg of non-conjugated pepL1 and splenocytes seeded at 10<sup>6</sup> cells/well. One-way ANOVA with Tukey's multiple comparison test. \*  $p < 0.05$ , \*\*  $p < 0.01$ , \*\*\*\*  $p < 0.0001$ .

**Table S1.** Structure-based predicted linear epitopes by Ellipro, using the Homology model of BuiC8 generated by Modeller and the structure of the VceC efflux pump of *Vibrio cholerae* (PDB code 1yc9, seqid 35%) as a template.

| No. ♦ | Chain ♦ | Start ♦ | End ♦ | Peptide                                                           | Number of residues ♦ | Score ♦ |
|-------|---------|---------|-------|-------------------------------------------------------------------|----------------------|---------|
| 1     | A       | 139     | 173   | GNLSLMRQHWPDNVYGPGLANADTWNTGTLSL                                  | 35                   | 0.888   |
| 2     | A       | 233     | 269   | YERQNALAELARKRLRAGIGTQLEVSQAEAPLPDYSR                             | 37                   | 0.793   |
| 3     | A       | 341     | 406   | IDVAKAAFYPNVDLIASLGGFAVSAPFATFLRAMNGGWSAGPALTLPFEGGRLRAQLGVASAGYD | 66                   | 0.741   |
| 4     | A       | 449     | 474   | RSYDLSHAGFSRGLTDYVNVLIAQSQ                                        | 26                   | 0.683   |
| 5     | A       | 306     | 321   | LDANAALPSALPAELL                                                  | 16                   | 0.627   |
| 6     | A       | 291     | 299   | KGPGAGASL                                                         | 9                    | 0.587   |

**Table S2.** MHCII binding affinity predictions of pepL1 (a) and pepL2 (b) using the IEDB Tool and the NN-align method. IC50 values (nM) below 100 nM are shown in orange and below 50 nM in red.

| a) pepL1 sequence QHWPDNVYYPGPGPLANADT |                         |                           |        |               |                   |                          |                        |                       |
|----------------------------------------|-------------------------|---------------------------|--------|---------------|-------------------|--------------------------|------------------------|-----------------------|
| #                                      | Peptide                 | Allele                    | Length | NN align core | NN align IC50(nM) | NN align percentile rank | NN align adjusted rank | N. of binding alleles |
| 1                                      | DNVYYPGPGPLAN           | HLA-DQA1*05:01/DQB1*03:01 | 12     | VYYGPGPLA     | 200.5             | 3                        | 8.9                    | 3                     |
|                                        |                         | HLA-DRB1*01:01            | 12     | VYYGPGPLA     | 344.1             | 31                       | 91.92                  |                       |
|                                        |                         | HLA-DRB1*09:01            | 12     | VYYGPGPLA     | 482.7             | 16                       | 47.44                  |                       |
|                                        |                         |                           |        |               |                   |                          |                        |                       |
| 2                                      | DNVYYPGPGPLANA          | HLA-DQA1*05:01/DQB1*03:01 | 13     | VYYGPGPLA     | 119.6             | 2.8                      | 4.37                   | 3                     |
|                                        |                         | HLA-DRB1*01:01            | 13     | VYYGPGPLA     | 150.7             | 31                       | 48.34                  |                       |
|                                        |                         | HLA-DRB1*09:01            | 13     | VYYGPGPLA     | 396.9             | 20                       | 31.19                  |                       |
|                                        |                         |                           |        |               |                   |                          |                        |                       |
| 3                                      | DNVYYPGPGPLANAD         | HLA-DQA1*05:01/DQB1*03:01 | 14     | VYYGPGPLA     | 92.5              | 3.5                      | 3.77                   | 3                     |
|                                        |                         | HLA-DRB1*01:01            | 14     | VYYGPGPLA     | 148.4             | 36                       | 38.76                  |                       |
|                                        |                         | HLA-DRB1*09:01            | 14     | VYYGPGPLA     | 417.7             | 27                       | 29.07                  |                       |
|                                        |                         |                           |        |               |                   |                          |                        |                       |
| 4                                      | DNVYYPGPGPLANAD<br>T    | HLA-DQA1*05:01/DQB1*03:01 | 15     | VYYGPGPLA     | 71.5              | 4.4                      | 4.4                    | 3                     |
|                                        |                         | HLA-DRB1*01:01            | 15     | VYYGPGPLA     | 213.2             | 39                       | 39                     |                       |
|                                        |                         | HLA-DRB1*09:01            | 15     | VYYGPGPLA     | 464.7             | 33                       | 33                     |                       |
|                                        |                         |                           |        |               |                   |                          |                        |                       |
| 5                                      | HWPDNVYYPGPGPLA         | HLA-DQA1*05:01/DQB1*03:01 | 14     | VYYGPGPLA     | 311.8             | 12                       | 12.92                  | 2                     |
|                                        |                         | HLA-DRB1*09:01            | 14     | NVYYPGPGPL    | 425.9             | 27                       | 29.07                  |                       |
| 6                                      | HWPDNVYYPGPGPLA<br>N    | HLA-DQA1*05:01/DQB1*03:01 | 15     | VYYGPGPLA     | 104.8             | 6.6                      | 6.6                    | 2                     |
|                                        |                         | HLA-DRB1*09:01            | 15     | NVYYPGPGPL    | 383.7             | 30                       | 30                     |                       |
| 7                                      | HWPDNVYYPGPGPLA<br>NA   | HLA-DQA1*05:01/DQB1*03:01 | 16     | VYYGPGPLA     | 58.1              | 5.3                      | 6.12                   | 2                     |
|                                        |                         | HLA-DRB1*09:01            | 16     | NVYYPGPGPL    | 354.9             | 31                       | 35.78                  |                       |
| 8                                      | HWPDNVYYPGPGPLA<br>NAD  | HLA-DQA1*05:01/DQB1*03:01 | 17     | VYYGPGPLA     | 45.2              | 5.4                      | 9.2                    | 2                     |
|                                        |                         | HLA-DRB1*09:01            | 17     | NVYYPGPGPL    | 380.7             | 36                       | 61.32                  |                       |
| 9                                      | HWPDNVYYPGPGPLA<br>NADT | HLA-DRB1*09:01            | 18     | NVYYPGPGPL    | 386.2             | 41                       | 121.35                 | 1                     |
| 10                                     | NVYYPGPGPLANA           | HLA-DQA1*05:01/DQB1*03:01 | 12     | VYYGPGPLA     | 147.6             | 1.9                      | 5.63                   | 2                     |
|                                        |                         | HLA-DRB1*01:01            | 12     | VYYGPGPLA     | 192.4             | 22                       | 65.24                  |                       |
| 11                                     | NVYYPGPGPLANAD          | HLA-DQA1*05:01/DQB1*03:01 | 13     | VYYGPGPLA     | 123.4             | 3                        | 4.68                   | 2                     |
|                                        |                         | HLA-DRB1*01:01            | 13     | VYYGPGPLA     | 153.5             | 31                       | 48.34                  |                       |
| 12                                     | NVYYPGPGPLANADT         | HLA-DQA1*05:01/DQB1*03:01 | 14     | VYYGPGPLA     | 102.2             | 4                        | 4.31                   | 2                     |
|                                        |                         | HLA-DRB1*01:01            | 14     | VYYGPGPLA     | 156.5             | 37                       | 39.84                  |                       |
| 13                                     | PDNVYYPGPGPLA           | HLA-DQA1*05:01/DQB1*03:01 | 12     | VYYGPGPLA     | 438.7             | 15                       | 44.48                  | 2                     |
|                                        |                         | HLA-DQA1*05:01/DQB1*03:01 | 12     | VYYGPGPLA     | 482.7             | 7.2                      | 21.35                  |                       |

|    |                        |                           |    |           |       |     |        |   |
|----|------------------------|---------------------------|----|-----------|-------|-----|--------|---|
| 14 | PDNVYYGPGPLAN          | HLA-DQA1*05:01/DQB1*03:01 | 13 | VYYGPGPLA | 176.1 | 4.5 | 7.02   | 3 |
|    |                        | HLA-DRB1*01:01            | 13 | VYYGPGPLA | 301.2 | 43  | 67.05  |   |
|    |                        | HLA-DRB1*09:01            | 13 | VYYGPGPLA | 348.5 | 18  | 28.07  |   |
| 15 | PDNVYYGPGPLAN A        | HLA-DQA1*05:01/DQB1*03:01 | 14 | VYYGPGPLA | 98.7  | 3.8 | 4.09   | 3 |
|    |                        | HLA-DRB1*01:01            | 14 | VYYGPGPLA | 164.5 | 38  | 40.92  |   |
|    |                        | HLA-DRB1*09:01            | 14 | VYYGPGPLA | 302.9 | 22  | 23.69  |   |
| 16 | PDNVYYGPGPLAN A<br>D   | HLA-DQA1*05:01/DQB1*03:01 | 15 | VYYGPGPLA | 70.3  | 4.3 | 4.3    | 3 |
|    |                        | HLA-DRB1*01:01            | 15 | VYYGPGPLA | 227   | 40  | 40     |   |
|    |                        | HLA-DRB1*09:01            | 15 | VYYGPGPLA | 341.1 | 27  | 27     |   |
| 17 | PDNVYYGPGPLAN A<br>DT  | HLA-DQA1*05:01/DQB1*03:01 | 16 | VYYGPGPLA | 55.5  | 5   | 5.77   | 3 |
|    |                        | HLA-DRB1*01:01            | 16 | VYYGPGPLA | 382   | 40  | 46.17  |   |
|    |                        | HLA-DRB1*09:01            | 16 | NVYYGPGPL | 382.8 | 33  | 38.09  |   |
| 18 | QHWPDNVYYGPGPL<br>A    | HLA-DQA1*05:01/DQB1*03:01 | 15 | VYYGPGPLA | 244.6 | 14  | 14     | 2 |
|    |                        | HLA-DRB1*09:01            | 15 | NVYYGPGPL | 468.8 | 33  | 33     |   |
| 19 | QHWPDNVYYGPGPL<br>AN   | HLA-DQA1*05:01/DQB1*03:01 | 16 | VYYGPGPLA | 83.9  | 7.9 | 9.12   | 2 |
|    |                        | HLA-DRB1*09:01            | 16 | NVYYGPGPL | 424.2 | 35  | 40.4   |   |
| 20 | QHWPDNVYYGPGPL<br>ANA  | HLA-DQA1*05:01/DQB1*03:01 | 17 | VYYGPGPLA | 50.5  | 6.2 | 10.56  | 2 |
|    |                        | HLA-DRB1*09:01            | 17 | NVYYGPGPL | 374.2 | 36  | 61.32  |   |
| 21 | QHWPDNVYYGPGPL<br>ANAD | HLA-DQA1*05:01/DQB1*03:01 | 18 | VYYGPGPLA | 42    | 6.1 | 18.05  | 2 |
|    |                        | HLA-DRB1*09:01            | 18 | NVYYGPGPL | 380.1 | 40  | 118.39 |   |
| 22 | VYYGPGPLANAD           | HLA-DQA1*05:01/DQB1*03:01 | 12 | VYYGPGPLA | 221   | 3.3 | 9.79   | 2 |
|    |                        | HLA-DRB1*01:01            | 12 | VYYGPGPLA | 386.6 | 33  | 97.86  |   |
| 23 | VYYGPGPLANADT          | HLA-DQA1*05:01/DQB1*03:01 | 13 | VYYGPGPLA | 196.5 | 5   | 7.8    | 2 |
|    |                        | HLA-DRB1*01:01            | 13 | VYYGPGPLA | 313.7 | 44  | 68.61  |   |
| 24 | WPDNVYYGPGPLA          | HLA-DQA1*05:01/DQB1*03:01 | 13 | VYYGPGPLA | 379.5 | 9.1 | 14.19  | 2 |
|    |                        | HLA-DRB1*09:01            | 13 | NVYYGPGPL | 419.6 | 21  | 32.75  |   |
| 25 | WPDNVYYGPGPLAN         | HLA-DQA1*05:01/DQB1*03:01 | 14 | VYYGPGPLA | 137   | 5.6 | 6.03   | 3 |
|    |                        | HLA-DRB1*09:01            | 14 | VYYGPGPLA | 353.2 | 24  | 25.84  |   |
|    |                        | HLA-DRB1*01:01            | 14 | VYYGPGPLA | 379.8 | 54  | 58.15  |   |
| 26 | WPDNVYYGPGPLAN<br>A    | HLA-DQA1*05:01/DQB1*03:01 | 15 | VYYGPGPLA | 74.4  | 4.6 | 4.6    | 3 |
|    |                        | HLA-DRB1*01:01            | 15 | VYYGPGPLA | 288.3 | 44  | 44     |   |
|    |                        | HLA-DRB1*09:01            | 15 | VYYGPGPLA | 325.6 | 27  | 27     |   |
| 27 | WPDNVYYGPGPLAN<br>AD   | HLA-DQA1*05:01/DQB1*03:01 | 16 | VYYGPGPLA | 53.3  | 4.9 | 5.66   | 3 |

|                                       |                       | HLA-DRB1*09:01                    | 16     | VYYGPGPLA     | 367                  | 31                             | 35.78                        |                         |
|---------------------------------------|-----------------------|-----------------------------------|--------|---------------|----------------------|--------------------------------|------------------------------|-------------------------|
|                                       |                       | HLA-DRB1*01:01                    | 16     | VYYGPGPLA     | 455.4                | 43                             | 49.63                        |                         |
| 28                                    | WPDNVYYGPGPLAN<br>ADT | HLA-<br>DQA1*05:01/DQB1*03:<br>01 | 17     | VYYGPGPLA     | 45.5                 | 5.4                            | 9.2                          | 2                       |
|                                       |                       | HLA-DRB1*09:01                    | 17     | NVYYGPGPL     | 393.1                | 37                             | 63.02                        |                         |
| b) pepL2 sequence GGFGVTAPFTDFLRAMNGG |                       |                                   |        |               |                      |                                |                              |                         |
|                                       | Peptide               | Allele                            | Length | NN align core | NN align<br>IC50(nM) | NN align<br>percentile<br>rank | NN align<br>adjusted<br>rank | N.of binding<br>alleles |
| 1                                     | APFTDFLRAMNG          | HLA-DRB1*11:01                    | 12     | FTDFLRAMN     | 151.2                | 5.8                            | 17.2                         | 2                       |
|                                       |                       | HLA-DRB1*01:01                    | 12     | TDFLRAMNG     | 245.9                | 26                             | 77.1                         |                         |
| 2                                     | APFTDFLRAMNGG         | HLA-DRB1*11:01                    | 13     | FTDFLRAMN     | 90.8                 | 6.4                            | 9.98                         | 2                       |
|                                       |                       | HLA-DRB1*01:01                    | 13     | TDFLRAMNG     | 105                  | 25                             | 38.98                        |                         |
| 3                                     | FGVTAPFTDFLRA         | HLA-<br>DPA1*01:03/DPB1*02:01     | 13     | APFTDFLRA     | 392.6                | 9.6                            | 14.97                        | 1                       |
| 4                                     | FGVTAPFTDFLRA<br>M    | HLA-<br>DPA1*01:03/DPB1*02:01     | 14     | APFTDFLRA     | 257.2                | 8.9                            | 9.58                         | 1                       |
| 5                                     | FGVTAPFTDFLRA<br>MN   | HLA-<br>DPA1*01:03/DPB1*02:01     | 15     | APFTDFLRA     | 254.4                | 11                             | 11                           | 2                       |
|                                       |                       | HLA-<br>DPA1*03:01/DPB1*04:02     | 15     | TAPFTDFLR     | 400.6                | 17                             | 17                           |                         |
| 6                                     | FGVTAPFTDFLRA<br>MNG  | HLA-<br>DPA1*01:03/DPB1*02:01     | 16     | APFTDFLRA     | 285.3                | 14                             | 16.16                        |                         |
|                                       |                       | HLA-DRB1*11:01                    | 16     | FTDFLRAMN     | 313.4                | 18                             | 20.78                        |                         |
|                                       |                       | HLA-<br>DPA1*02:01/DPB1*05:01     | 16     | TAPFTDFLR     | 323.4                | 12                             | 13.85                        | 5                       |
|                                       |                       | HLA-<br>DPA1*03:01/DPB1*04:02     | 16     | TAPFTDFLR     | 379.9                | 23                             | 26.55                        |                         |
|                                       |                       | HLA-DRB1*08:02                    | 16     | FTDFLRAMN     | 434.7                | 23                             | 26.55                        |                         |
| 7                                     | FGVTAPFTDFLRA<br>MNGG | HLA-<br>DPA1*02:01/DPB1*05:01     | 17     | TAPFTDFLR     | 206.6                | 14                             | 23.85                        |                         |
|                                       |                       | HLA-DRB1*11:01                    | 17     | FTDFLRAMN     | 272.3                | 16                             | 27.25                        |                         |
|                                       |                       | HLA-DRB1*08:02                    | 17     | FTDFLRAMN     | 275.6                | 22                             | 37.47                        | 5                       |
|                                       |                       | HLA-<br>DPA1*01:03/DPB1*02:01     | 17     | APFTDFLRA     | 311.5                | 16                             | 27.25                        |                         |
|                                       |                       | HLA-<br>DPA1*03:01/DPB1*04:02     | 17     | TAPFTDFLR     | 385.3                | 29                             | 49.39                        |                         |
| 8                                     | GFGVTAPFTDFL          | HLA-DRB1*07:01                    | 12     | FGVTAPFTD     | 443.5                | 21                             | 62.27                        |                         |
|                                       |                       | HLA-<br>DQA1*05:01/DQB1*02:01     | 12     | VTAPFTDFL     | 487.6                | 4.4                            | 13.05                        | 2                       |
| 9                                     | GFGVTAPFTDFLR         | HLA-DRB1*09:01                    | 13     | FGVTAPFTD     | 483.8                | 23                             | 35.87                        | 1                       |
| 10                                    | GFGVTAPFTDFLRA        | HLA-<br>DPA1*01:03/DPB1*02:01     | 14     | APFTDFLRA     | 346.7                | 12                             | 12.92                        | 1                       |
| 11                                    | GFGVTAPFTDFLRA<br>M   | HLA-<br>DPA1*01:03/DPB1*02:01     | 15     | APFTDFLRA     | 241.7                | 11                             | 11                           | 1                       |
| 12                                    | GFGVTAPFTDFLRA<br>MN  | HLA-<br>DPA1*01:03/DPB1*02:01     | 16     | APFTDFLRA     | 241.5                | 12                             | 13.85                        |                         |
|                                       |                       | HLA-<br>DPA1*02:01/DPB1*05:01     | 16     | TAPFTDFLR     | 305.8                | 11                             | 12.7                         | 3                       |
|                                       |                       | HLA-<br>DPA1*03:01/DPB1*04:02     | 16     | TAPFTDFLR     | 309.1                | 20                             | 23.09                        |                         |
| 13                                    | GFGVTAPFTDFLRA<br>MNG | HLA-<br>DPA1*02:01/DPB1*05:01     | 17     | TAPFTDFLR     | 181.9                | 13                             | 22.14                        |                         |
|                                       |                       | HLA-<br>DPA1*01:03/DPB1*02:01     | 17     | APFTDFLRA     | 260                  | 14                             | 23.85                        |                         |
|                                       |                       | HLA-DRB1*08:02                    | 17     | FTDFLRAMN     | 291.8                | 23                             | 39.17                        | 6                       |
|                                       |                       | HLA-<br>DPA1*03:01/DPB1*04:02     | 17     | TAPFTDFLR     | 307.7                | 25                             | 42.58                        |                         |
|                                       |                       | HLA-DRB1*11:01                    | 17     | FTDFLRAMN     | 369.6                | 19                             | 32.36                        |                         |

|    |                |                           |    |           |       |     |        |   |
|----|----------------|---------------------------|----|-----------|-------|-----|--------|---|
|    |                | HLA-DQA1*05:01/DQB1*02:01 | 17 | VTAPFTDFL | 483.5 | 18  | 30.66  |   |
|    |                | HLA-DPA1*02:01/DPB1*05:01 | 18 | TAPFTDFLR | 145.3 | 15  | 44.4   |   |
|    |                | HLA-DRB1*08:02            | 18 | FTDFLRAMN | 202.5 | 22  | 65.11  |   |
| 14 | GFGVTAPFTDFLRA | HLA-DPA1*01:03/DPB1*02:01 | 18 | APFTDFLRA | 273.4 | 17  | 50.31  | 6 |
|    | MNGG           | HLA-DRB1*11:01            | 18 | FTDFLRAMN | 285.1 | 17  | 50.31  |   |
|    |                | HLA-DPA1*03:01/DPB1*04:02 | 18 | TAPFTDFLR | 325.4 | 31  | 91.75  |   |
|    |                | HLA-DQA1*05:01/DQB1*02:01 | 18 | VTAPFTDFL | 496.5 | 21  | 62.15  |   |
| 15 | GGFGVTAPFTDF   | HLA-DRB1*07:01            | 12 | FGVTAPFTD | 482.7 | 22  | 65.24  | 1 |
| 16 | GGFGVTAPFTDFL  | HLA-DQA1*05:01/DQB1*02:01 | 13 | GFGVTAPFT | 331.7 | 4.6 | 7.17   | 3 |
|    |                | HLA-DRB1*09:01            | 13 | FGVTAPFTD | 333.8 | 18  | 28.07  |   |
|    |                | HLA-DRB1*07:01            | 13 | FGVTAPFTD | 383.2 | 25  | 38.98  |   |
| 17 | GGFGVTAPFTDFLR | HLA-DRB1*09:01            | 14 | FGVTAPFTD | 334.3 | 23  | 24.77  | 4 |
|    |                | HLA-DQA1*05:01/DQB1*02:01 | 14 | GFGVTAPFT | 370   | 7.5 | 8.08   |   |
|    |                | HLA-DRB1*07:01            | 14 | FGVTAPFTD | 486.9 | 32  | 34.46  |   |
|    |                | HLA-DPA1*01:03/DPB1*02:01 | 14 | GVTAPFTDF | 499.4 | 15  | 16.15  |   |
| 18 | GGFGVTAPFTDFLR | HLA-DPA1*01:03/DPB1*02:01 | 15 | APFTDFLRA | 341.9 | 14  | 14     | 3 |
|    | A              | HLA-DQA1*05:01/DQB1*02:01 | 15 | GFGVTAPFT | 375.7 | 9.8 | 9.8    |   |
|    |                | HLA-DRB1*09:01            | 15 | FGVTAPFTD | 393.8 | 30  | 30     |   |
| 19 | GGFGVTAPFTDFLR | HLA-DPA1*01:03/DPB1*02:01 | 16 | APFTDFLRA | 243   | 12  | 13.85  | 5 |
|    | AM             | HLA-DQA1*05:01/DQB1*02:01 | 16 | GFGVTAPFT | 360.2 | 12  | 13.85  |   |
|    |                | HLA-DRB1*09:01            | 16 | FGVTAPFTD | 459.8 | 36  | 41.55  |   |
|    |                | HLA-DQA1*05:01/DQB1*03:01 | 16 | FGVTAPFTD | 469.2 | 29  | 33.47  |   |
|    |                | HLA-DPA1*03:01/DPB1*04:02 | 16 | TAPFTDFLR | 489.4 | 27  | 31.17  |   |
| 20 | GGFGVTAPFTDFLR | HLA-DPA1*02:01/DPB1*05:01 | 17 | TAPFTDFLR | 183.1 | 13  | 22.14  | 7 |
|    | AMN            | HLA-DPA1*01:03/DPB1*02:01 | 17 | APFTDFLRA | 237.7 | 13  | 22.14  |   |
|    |                | HLA-DPA1*03:01/DPB1*04:02 | 17 | TAPFTDFLR | 276.5 | 23  | 39.17  |   |
|    |                | HLA-DQA1*05:01/DQB1*02:01 | 17 | GFGVTAPFT | 369.4 | 14  | 23.85  |   |
|    |                | HLA-DQA1*05:01/DQB1*03:01 | 17 | FGVTAPFTD | 405.3 | 33  | 56.21  |   |
|    |                | HLA-DRB1*08:02            | 17 | FTDFLRAMN | 426.9 | 32  | 54.5   |   |
|    |                | HLA-DRB1*09:01            | 17 | FGVTAPFTD | 447.7 | 39  | 66.43  |   |
| 21 | GGFGVTAPFTDFLR | HLA-DPA1*02:01/DPB1*05:01 | 18 | TAPFTDFLR | 138.1 | 15  | 44.4   | 8 |
|    | AMNG           | HLA-DRB1*08:02            | 18 | FTDFLRAMN | 243   | 26  | 76.95  |   |
|    |                | HLA-DPA1*01:03/DPB1*02:01 | 18 | APFTDFLRA | 246.9 | 15  | 44.4   |   |
|    |                | HLA-DPA1*03:01/DPB1*04:02 | 18 | TAPFTDFLR | 288   | 29  | 85.83  |   |
|    |                | HLA-DQA1*05:01/DQB1*02:01 | 18 | GFGVTAPFT | 357.6 | 16  | 47.35  |   |
|    |                | HLA-DQA1*05:01/DQB1*03:01 | 18 | FGVTAPFTD | 376.3 | 36  | 106.55 |   |
|    |                | HLA-DRB1*11:01            | 18 | FTDFLRAMN | 388.3 | 21  | 62.15  |   |

|    |                      |                           |    |           |       |     |        |   |
|----|----------------------|---------------------------|----|-----------|-------|-----|--------|---|
|    |                      | HLA-DRB1*09:01            | 18 | FGVTAPFTD | 466   | 45  | 133.19 |   |
| 22 | GVTAPFTDFLRAM        | HLA-DPA1*01:03/DPB1*02:01 | 13 | APFTDFLRA | 328.4 | 8.5 | 13.25  | 1 |
| 23 | GVTAPFTDFLRAM<br>N   | HLA-DPA1*01:03/DPB1*02:01 | 14 | APFTDFLRA | 307.7 | 11  | 11.84  | 2 |
|    |                      | HLA-DRB1*11:01            | 14 | FTDFLRAMN | 461   | 23  | 24.77  |   |
| 24 | GVTAPFTDFLRAM<br>NG  | HLA-DRB1*11:01            | 15 | FTDFLRAMN | 212.6 | 16  | 16     | 2 |
|    |                      | HLA-DPA1*01:03/DPB1*02:01 | 15 | APFTDFLRA | 344   | 14  | 14     |   |
|    |                      | HLA-DRB1*11:01            | 16 | FTDFLRAMN | 201.8 | 14  | 16.16  |   |
|    |                      | HLA-DRB1*08:02            | 16 | FTDFLRAMN | 312.5 | 17  | 19.62  |   |
| 25 | GVTAPFTDFLRAM<br>NGG | HLA-DPA1*01:03/DPB1*02:01 | 16 | APFTDFLRA | 387.9 | 17  | 19.62  | 5 |
|    |                      | HLA-DPA1*02:01/DPB1*05:01 | 16 | TAPFTDFLR | 444.3 | 15  | 17.31  |   |
|    |                      | HLA-DPA1*03:01/DPB1*04:02 | 16 | TAPFTDFLR | 499.8 | 27  | 31.17  |   |
| 26 | PFTDFLRAMNGG         | HLA-DRB1*11:01            | 12 | FTDFLRAMN | 127.1 | 5   | 14.83  | 2 |
|    |                      | HLA-DRB1*01:01            | 12 | TDFLRAMNG | 129.8 | 17  | 50.41  |   |
| 27 | TAPFTDFLRAMN         | HLA-DRB1*11:01            | 12 | FTDFLRAMN | 468.2 | 13  | 38.55  | 1 |
| 28 | TAPFTDFLRAMNG        | HLA-DRB1*11:01            | 13 | FTDFLRAMN | 139.2 | 8.7 | 13.57  | 2 |
|    |                      | HLA-DRB1*01:01            | 13 | TDFLRAMNG | 241.2 | 39  | 60.82  |   |
| 29 | TAPFTDFLRAMNG<br>G   | HLA-DRB1*11:01            | 14 | FTDFLRAMN | 96.6  | 8.7 | 9.37   | 2 |
|    |                      | HLA-DRB1*01:01            | 14 | TDFLRAMNG | 156.7 | 37  | 39.84  |   |
| 30 | VTAPFTDFLRAM         | HLA-DPA1*01:03/DPB1*02:01 | 12 | APFTDFLRA | 418.3 | 7.2 | 21.35  | 1 |
| 31 | VTAPFTDFLRAMN        | HLA-DPA1*01:03/DPB1*02:01 | 13 | APFTDFLRA | 377   | 9.4 | 14.66  | 2 |
|    |                      | HLA-DRB1*11:01            | 13 | FTDFLRAMN | 441.7 | 19  | 29.63  |   |
| 32 | VTAPFTDFLRAMN<br>G   | HLA-DRB1*11:01            | 14 | FTDFLRAMN | 155.6 | 13  | 14     | 3 |
|    |                      | HLA-DRB1*01:01            | 14 | TDFLRAMNG | 344.4 | 52  | 55.99  |   |
|    |                      | HLA-DPA1*01:03/DPB1*02:01 | 14 | APFTDFLRA | 413.6 | 13  | 14     |   |
| 33 | VTAPFTDFLRAMN<br>GG  | HLA-DRB1*11:01            | 15 | FTDFLRAMN | 131.2 | 11  | 11     | 4 |
|    |                      | HLA-DRB1*08:02            | 15 | FTDFLRAMN | 393.3 | 13  | 13     |   |
|    |                      | HLA-DRB1*01:01            | 15 | TDFLRAMNG | 426.6 | 52  | 52     |   |
|    |                      | HLA-DPA1*01:03/DPB1*02:01 | 15 | APFTDFLRA | 468   | 17  | 17     |   |
